# Supplementary material
Source: publisher figshare collection journal article supplement (https://future-science-group.figshare.com/articles/dataset/_/19170074)

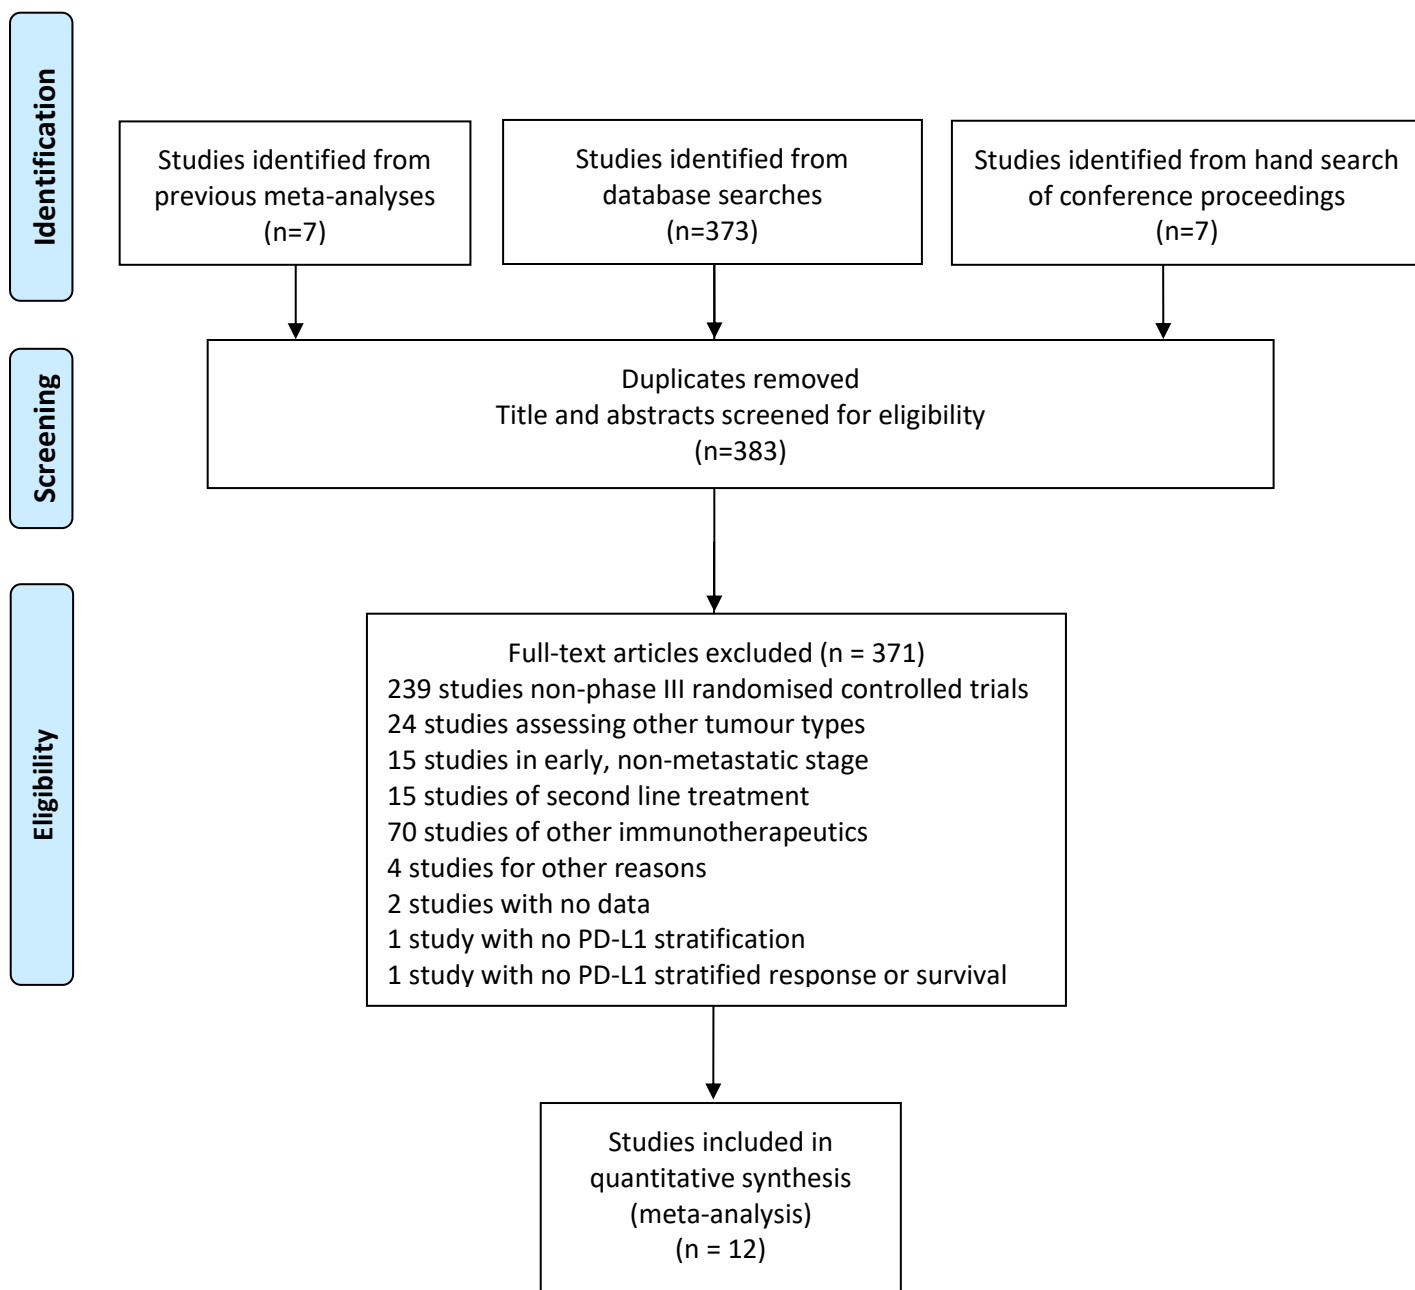

**Figure S1** Flow diagram showing inclusion and exclusion of studies

Supplement: Supplementary file 1 [file 1]

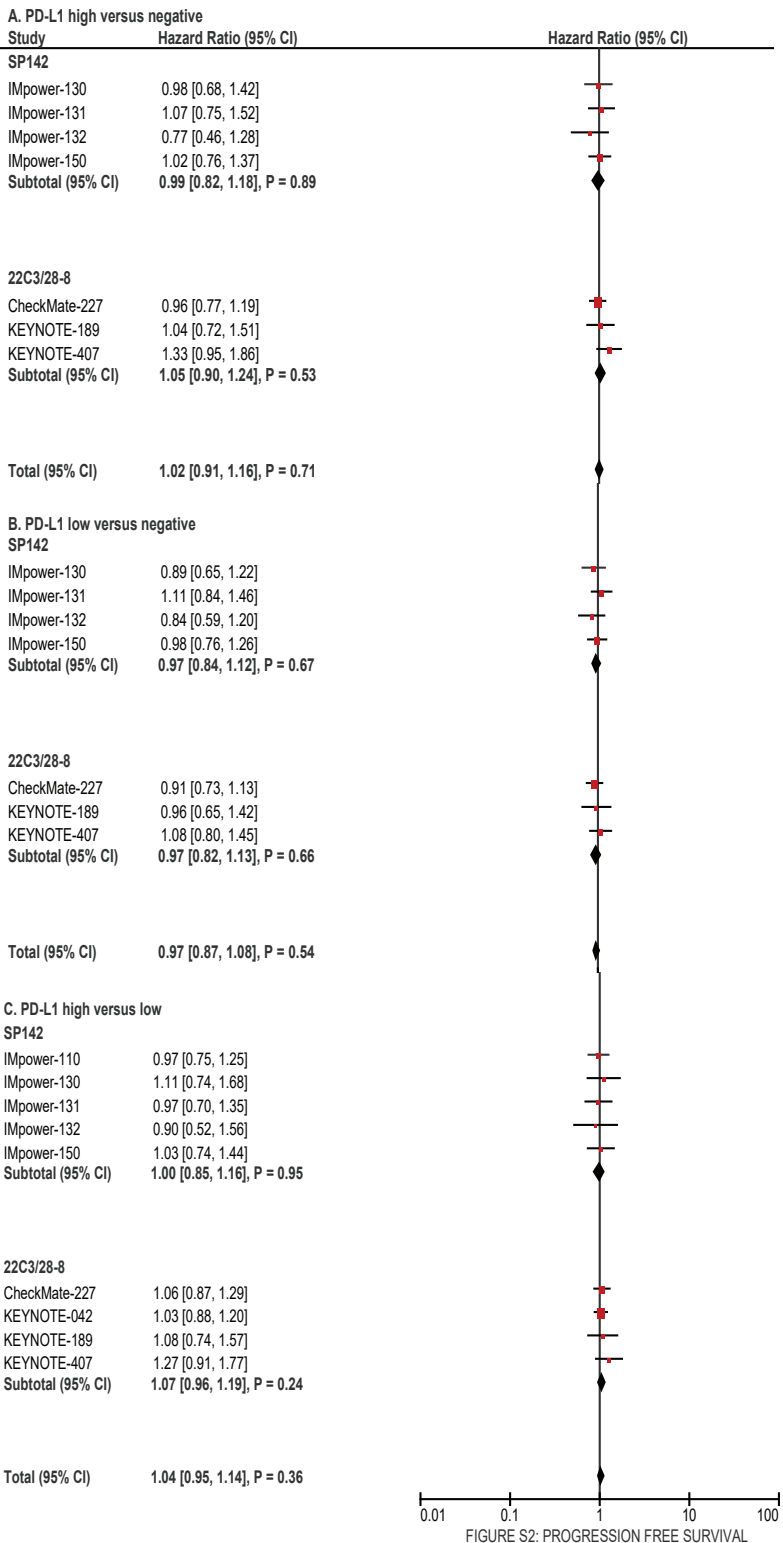

FIGURE S2: PROGRESSION FREE SURVIVAL

Supplement: Supplementary file 2 [file 1]

A. PD-L1 high vs negative

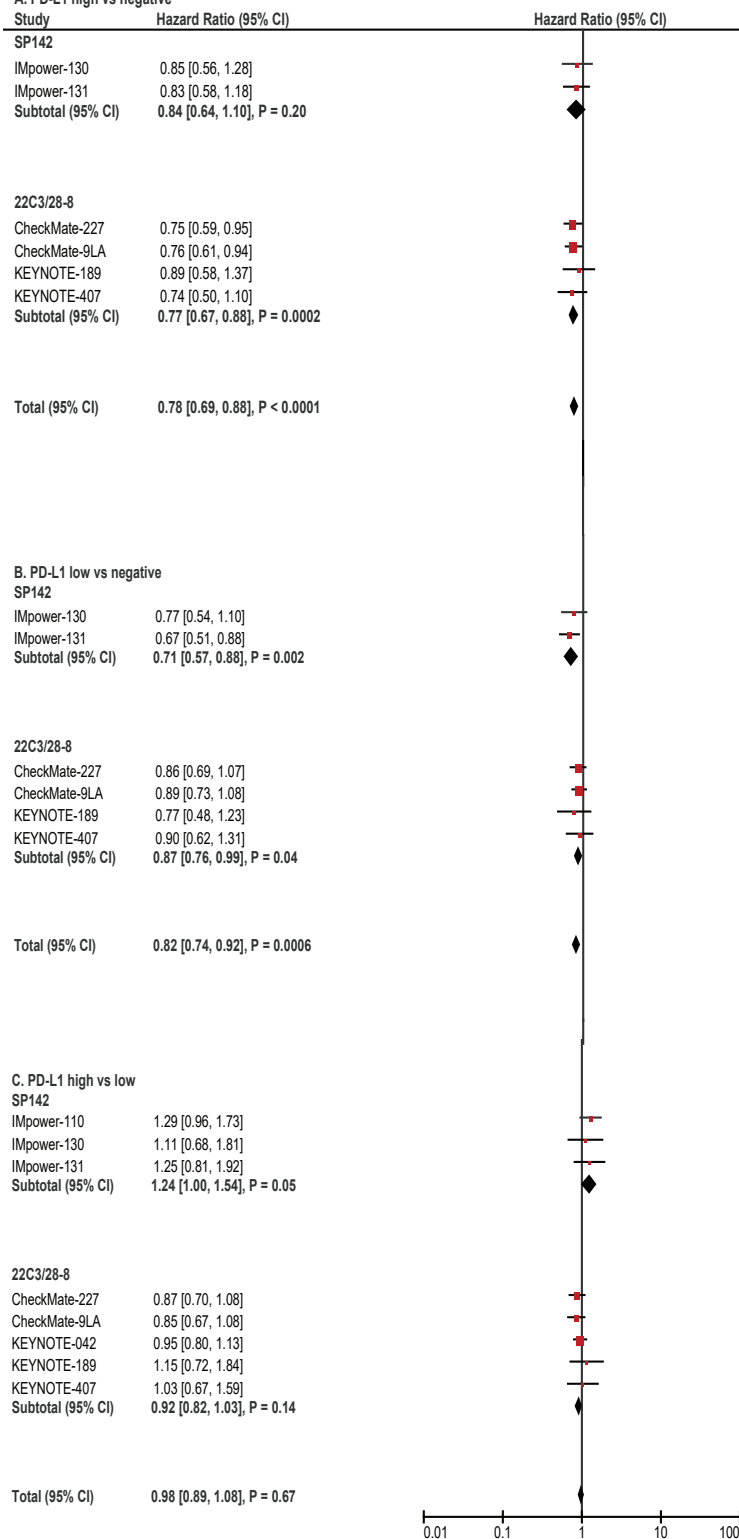

FIGURE S3A: OVERALL SURVIVAL

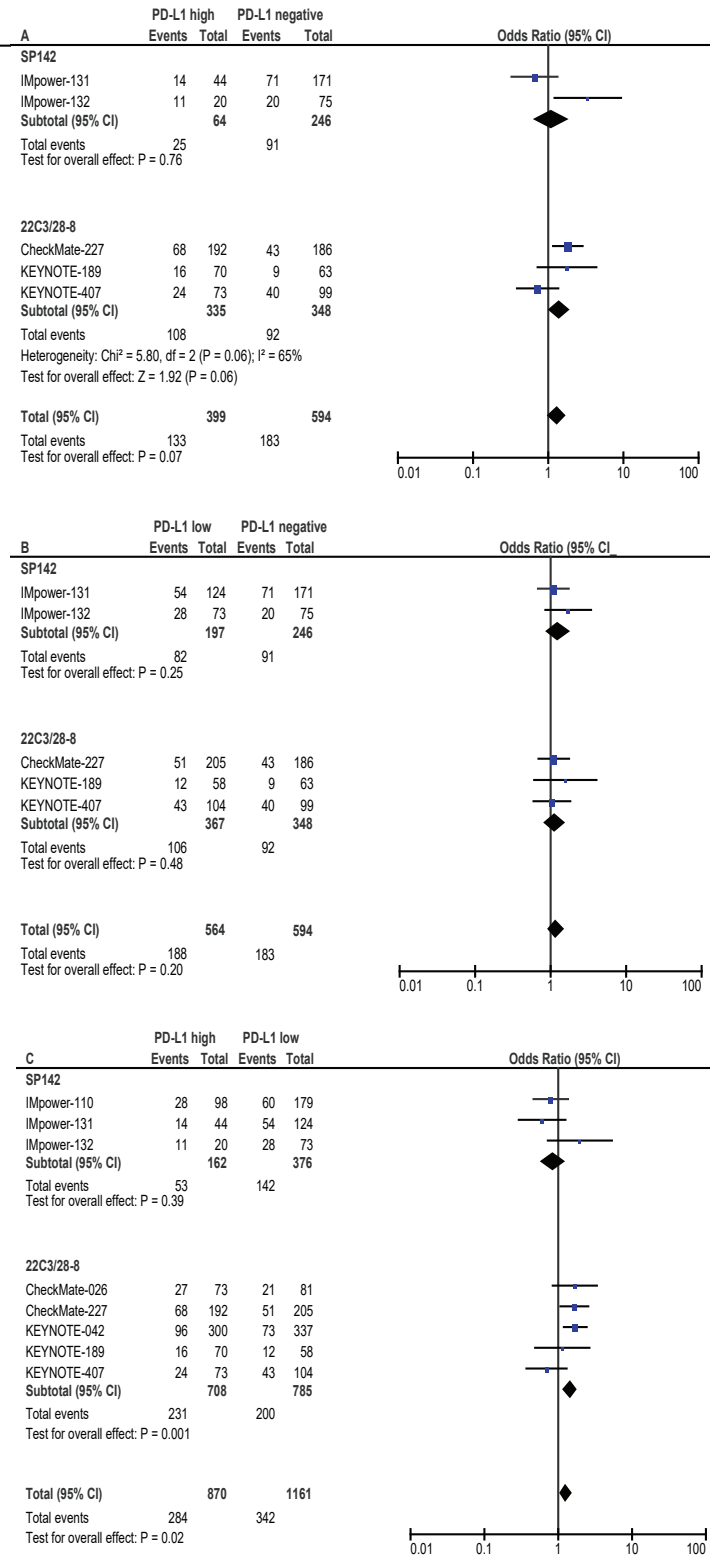

FIGURE S3B: OVERALL RESPONSE RATE

Supplement: Supplementary file 3 [file 1]
